# Supplementary material
Source: PubMed Central journal article supplement (PMC4302727)

**Power analysis**

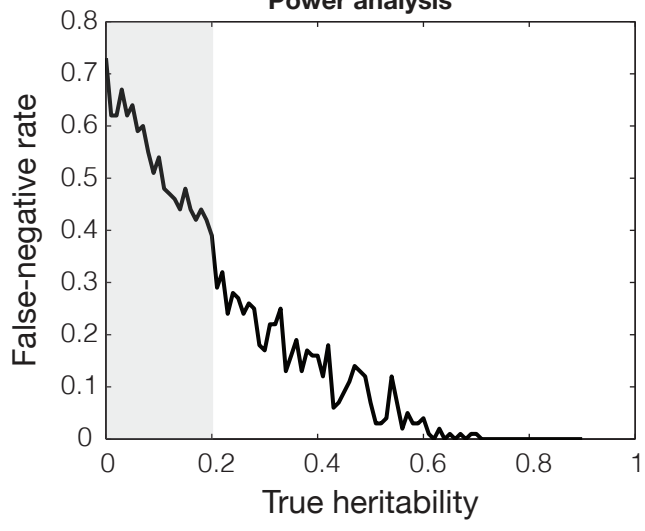

Supplement: NIHMS651809-supplement-1.pdf [file NIHMS651809-supplement-1.pdf]

# pFlow measurements absolute fold-change vs. heritability

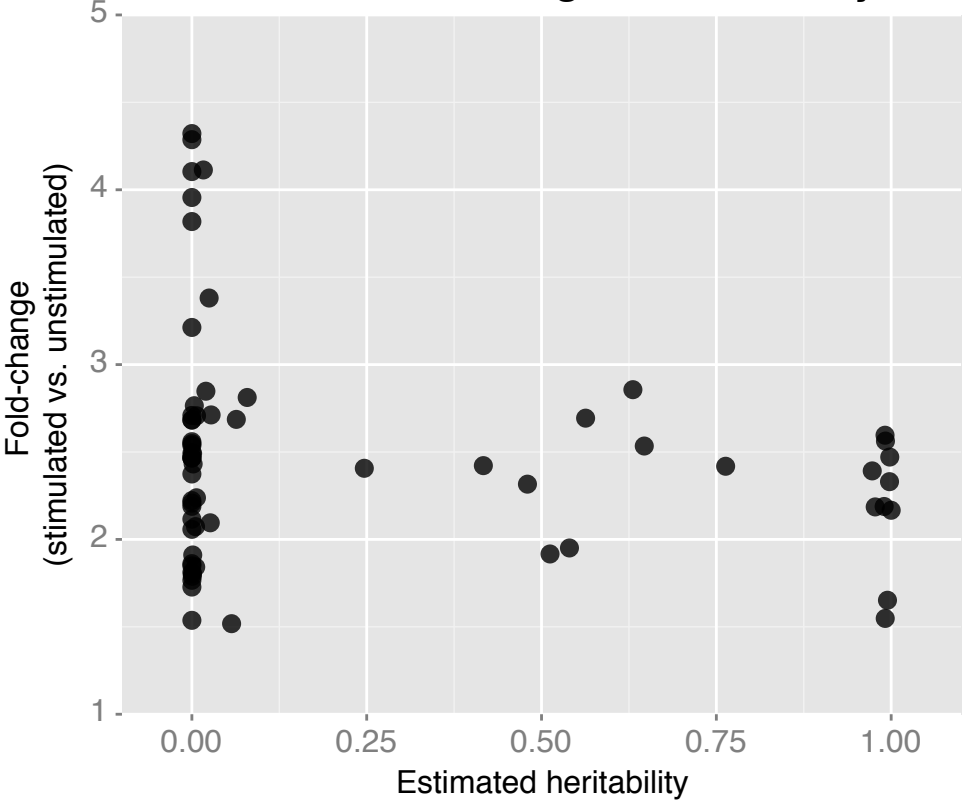

Supplement: NIHMS651809-supplement-2.pdf [file NIHMS651809-supplement-2.pdf]

## Variance and estimated heritability

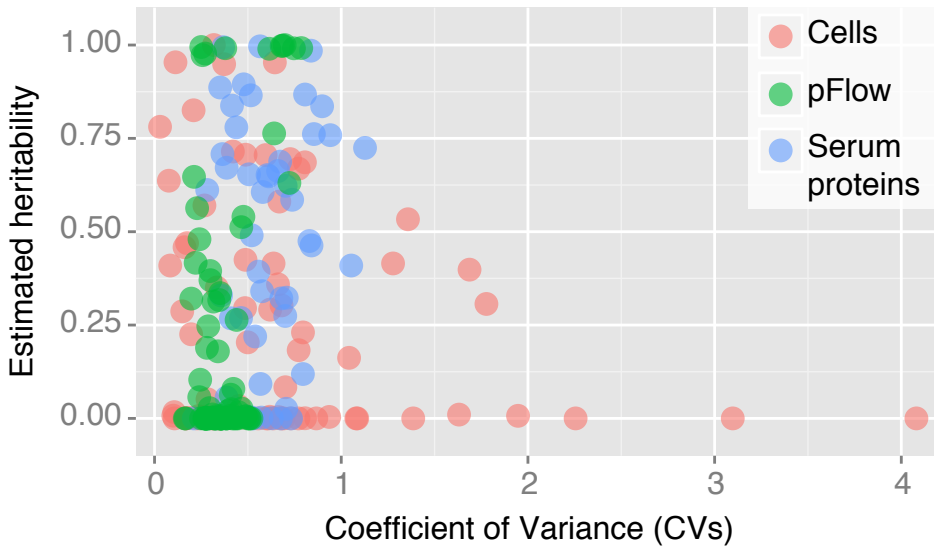

Supplement: NIHMS651809-supplement-3.pdf [file NIHMS651809-supplement-3.pdf]

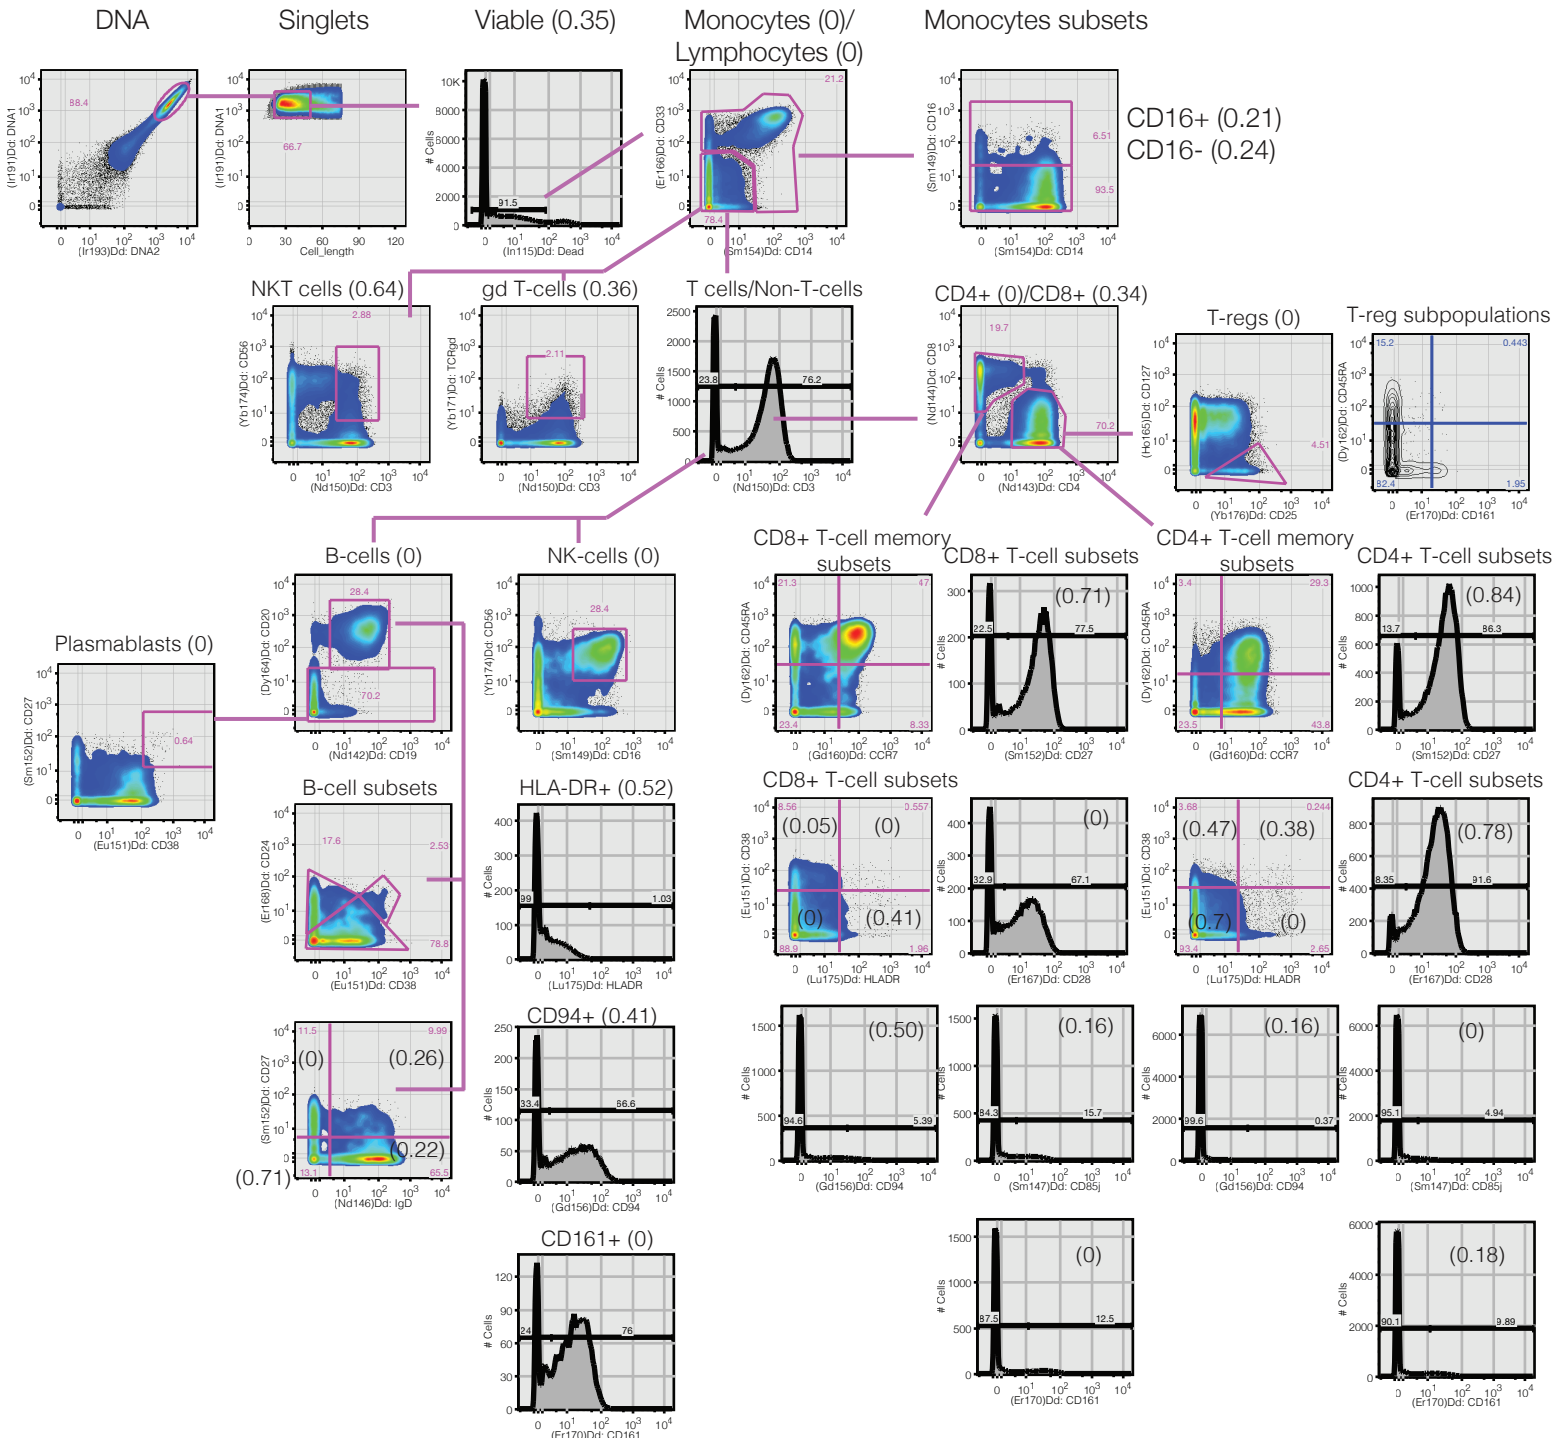

Supplement: NIHMS651809-supplement-4.pdf [file NIHMS651809-supplement-4.pdf]

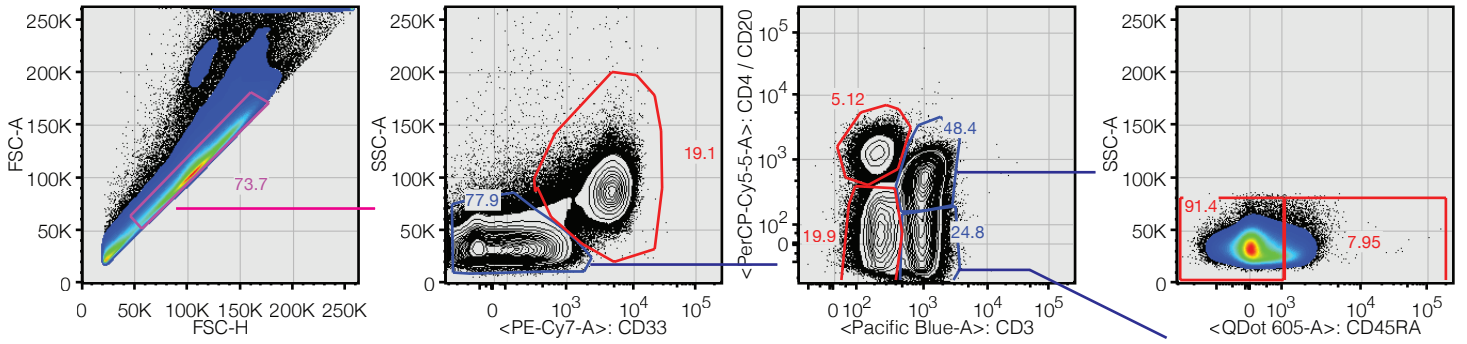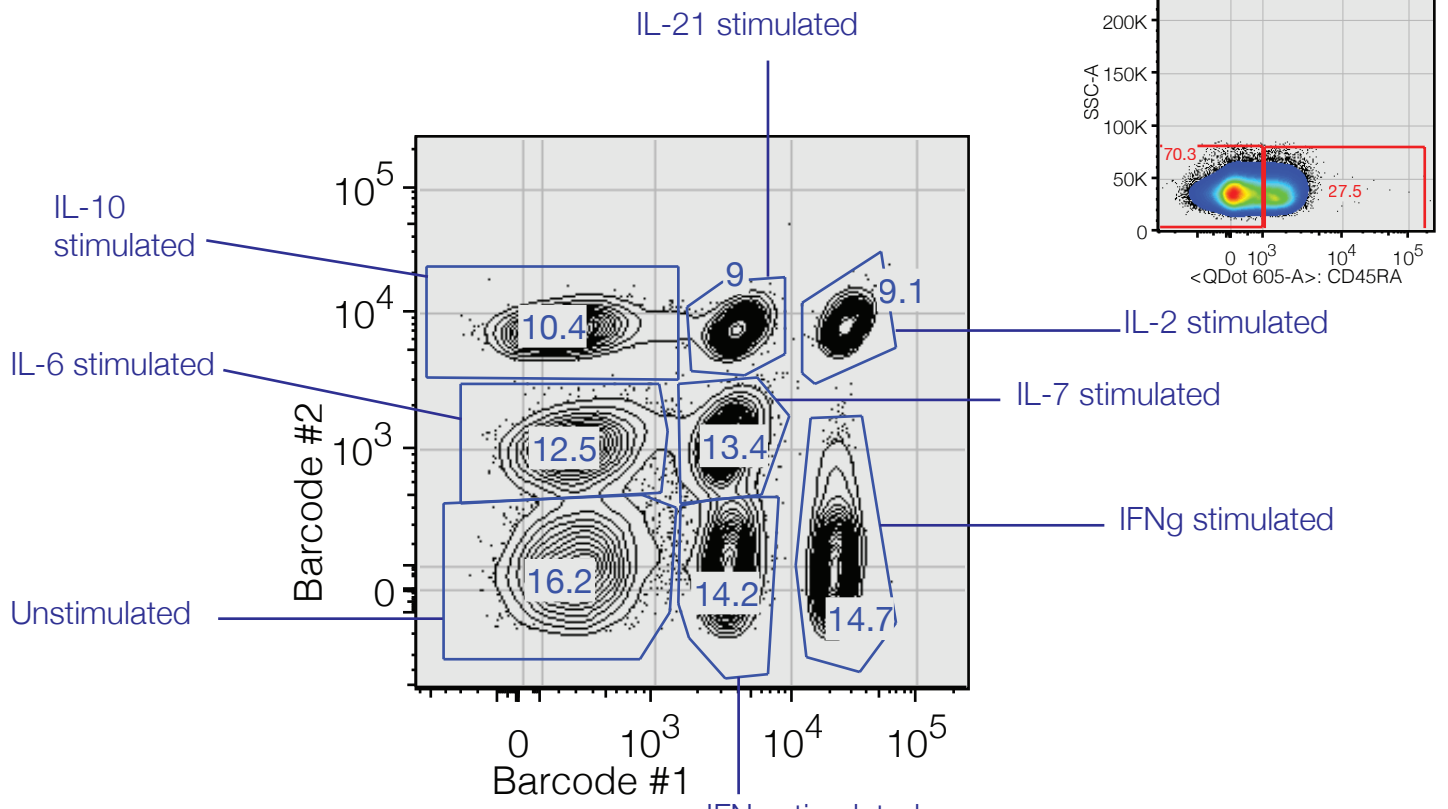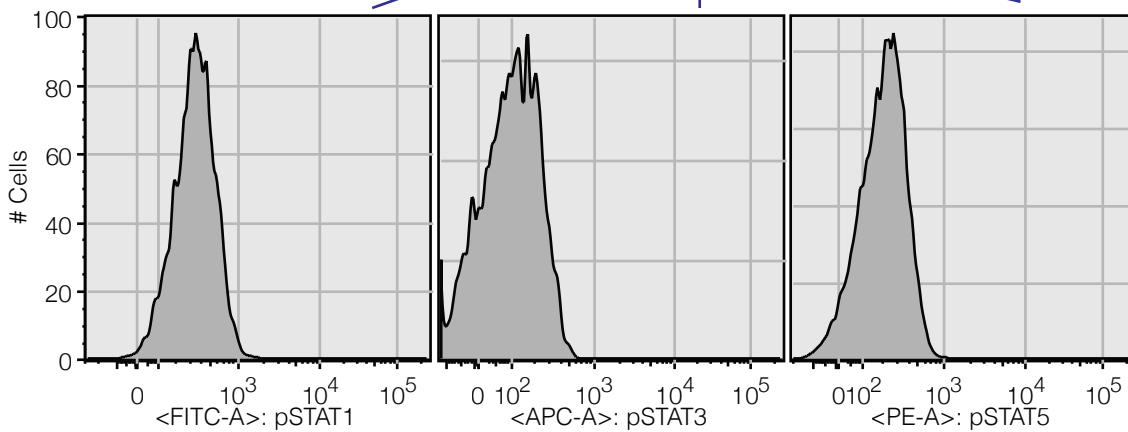

Supplement: NIHMS651809-supplement-5.pdf [file NIHMS651809-supplement-5.pdf]

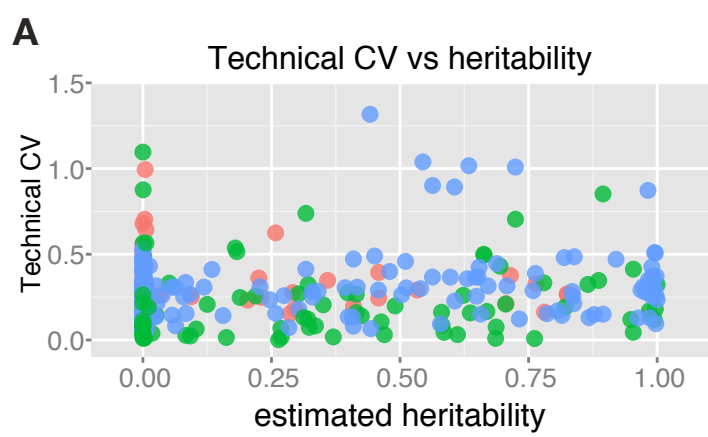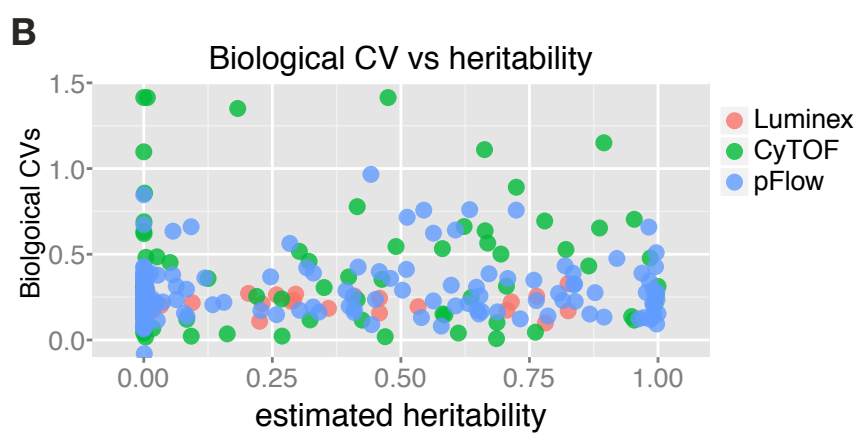

Supplement: NIHMS651809-supplement-6.pdf [file NIHMS651809-supplement-6.pdf]
